# Supplementary material for: Genome-Wide Association Study and Identification of Candidate Genes for Nitrogen Use Efficiency in Barley (Hordeum vulgare L.)
Source: Front Plant Sci. 2020 Sep 4;11:571912. doi: 10.3389/fpls.2020.571912 (PMC7500209; doi:10.3389/fpls.2020.571912)
Supplement: Supplementary file 3 [file Table_1.xlsx]

## Sheet: Supplementary Table S1
Supplementary Table S1: Origin of barley accessions used in the hydroponics experiment
Phenology ID	Variety	Origin	Region	Head type	Growth habit
P0086	ACMETCALFE	CAN	North America	two-row	spring
P0087	ACOxbow	CAN	North America	two-row	spring
P0088	ADAGIO	FRA	Europe	two-row	spring
P0101	Andre	USA	North America	two-row	spring
P0103	Annika	SWE	Europe	two-row	spring
P0104	Antarctica01	BRA	South America	two-row	spring
P0105	Apex	NLD	Europe	two-row	spring
P0115	ASPLUNDSVALOF	NOR	Europe	six-row	spring
P0118	Atem	GBR	Europe	two-row	spring
P0121	Atribut	CZE	Europe	two-row	spring
P0128	B531	CHN	Asia	two-row	nd
P0130	B583	CHN	Asia	two-row	nd
P0132	B645	CHN	Asia	two-row	nd
P0133	B697	CHN	Asia	two-row	nd
P0139	Barke	DEU	Europe	two-row	spring
P0145	BEARPAW	USA	North America	two-row	spring
P0146	Beatrice	FRA	Europe	two-row	spring
P0148	BEKA	FRA	Europe	two-row	spring
P0149	Bellini	FRA	Europe	two-row	spring
P0150	Bentley	CAN	North America	two-row	spring
P0152	Binalong	AUS	Australia	two-row	spring
P0155	BM9311-35	CAN	North America	two-row	spring
P0161	BM9752D-125	CAN	North America	two-row	spring
P0162	BM9857-263-1	CAN	North America	two-row	spring
P0167	BoaFe	PRT	Europe	two-row	spring
P0169	BOLRON	USA	North America	six-row	facultative
P0171	BOWMAN	USA	North America	two-row	spring
P0175	Braemar	GBR	Europe	two-row	spring
P0177	Bridge	CAN	North America	two-row	spring
P0178	Brindabella	AUS	Australia	two-row	spring
P0181	BT634-ACLacombe	CAN	North America	six-row	spring
P0183	Buloke	AUS	Australia	two-row	spring
P0191	C01P-53	URY	South America	two-row	nd
P0192	C01P-66	URY	South America	two-row	nd
P0212	C98Prel-60	URY	South America	two-row	nd
P0216	Caminant	DNK	Europe	two-row	spring
P0219	CARAVELA	PRT	Europe	two-row	spring
P0230	CDCDolly	CAN	North America	two-row	spring
P0233	CDCGuardian	CAN	North America	two-row	spring
P0234	CDCKendall	CAN	North America	two-row	spring
P0237	CDCMeredith	CAN	North America	two-row	spring
P0238	CDCReserve	CAN	North America	two-row	spring
P0239	CDCSisler	CAN	North America	six-row	spring
P0241	CDCStratus	CAN	North America	two-row	spring
P0242	CDCTISDALE	CAN	North America	six-row	spring
P0243	CDCUNITY	CAN	North America	two-row	spring
P0244	CDCYorkton	CAN	North America	six-row	spring
P0247	Cellar	GBR	Europe	two-row	spring
P0250	Chapais	CAN	North America	six-row	spring
P0251	Charger	AUS	Australia	two-row	spring
P0253	Charlottetown	CAN	North America	two-row	spring
P0255	CHERI	DEU	Europe	two-row	spring
P0261	CI5791	ETH	Africa	two-row	spring
P0262	CI9819	ETH	Africa	two-row	spring
P0263	Clara	SWE	Europe	two-row	spring
P0265	Clarity	GBR	Europe	two-row	spring
P0266	Clark	USA	North America	two-row	spring
P0271	CLE203	URY	South America	two-row	spring
P0275	CLE235	URY	South America	two-row	spring
P0277	CLE268	URY	South America	two-row	spring
P0282	CM67	USA	North America	six-row	spring
P0284	Commander	AUS	Australia	two-row	spring
P0285	Compass	AUS	Australia	two-row	spring
P0291	CORGI	GBR	Europe	two-row	spring
P0292	Cowabbie	AUS	Australia	two-row	spring
P0294	CzechLandrace-243	CZE	Europe	two-row	spring
P0303	Defra	DEU	Europe	two-row	spring
P0304	Delibes	GBR	Europe	two-row	spring
P0306	Dera	DEU	Europe	two-row	spring
P0307	Derkado	GBR	Europe	two-row	spring
P0316	DIABAS	CZE	Europe	two-row	spring
P0324	DVORAN	SVK	Europe	two-row	spring
P0327	EB1111	AUS	Australia	two-row	spring
P0329	Edda	SWE	Europe	six-row	spring
P0330	EMIRCOMPLEX	SWE	Europe	two-row	spring
P0331	EMPRESS	CAN	North America	six-row	spring
P0333	EUNOVA	DNK	Europe	two-row	spring
P0334	EUROPA	NLD	Europe	two-row	spring
P0335	Excel	USA	North America	six-row	spring
P0336	Expres	SVK	Europe	two-row	spring
P0337	Fairview	NZL	Australia	two-row	spring
P0342	FILIPPA	SWE	Europe	two-row	spring
P0343	Finniss	AUS	Australia	two-row	spring
P0347	Flagship	AUS	Australia	two-row	spring
P0348	Fleet	AUS	Australia	two-row	spring
P0349	Flinders	AUS	Australia	two-row	spring
P0350	FORMULA	GBR	Europe	two-row	spring
P0352	Foster	USA	North America	six-row	spring
P0353	FR/DAYTON	USA	North America	six-row	winter
P0355	France30161	FRA	Europe	two-row	winter
P0361	GALAN	CZE	Europe	two-row	spring
P0367	Gimpel	GBR	Europe	two-row	spring
P0371	GrangeR	AUS	Australia	two-row	spring
P0372	Granifen	CZE	Europe	two-row	spring
P0373	Grimmett	AUS	Australia	two-row	spring
P0374	Grout	AUS	Australia	two-row	spring
P0376	GSHO2483(in XV2334-6R from Indian Dwarf, slender dwarf 5 mutant)	USA	North America	six-row	spring
P0386	Hamelin	AUS	Australia	two-row	spring
P0389	Hannan	AUS	Australia	two-row	spring
P0390	HANNCHEN	SWE	Europe	two-row	spring
P0394	HARRINGTON	CAN	North America	two-row	spring
P0395	Harriot	DEU	Europe	two-row	spring
P0398	HarunaNijo	JPN	Asia	two-row	spring
P0399	Hassan	NLD	Europe	two-row	spring
P0400	Havanna	CZE	Europe	two-row	spring
P0408	HB382	CAN	North America	two-row	spring
P0413	Heart	GBR	Europe	two-row	spring
P0417	Heriot	GBR	Europe	two-row	spring
P0418	Heris	CZE	Europe	two-row	spring
P0419	Hindmarsh	AUS	Australia	two-row	spring
P0423	HuMai4Hao	CHN	Asia	two-row	spring
P0435	I90-137-1	USA	North America	two-row	spring
P0451	I97-415	USA	North America	two-row	spring
P0453	ICB104039	AFG	Middle East	six-row	facultative
P0456	IG16957	UZB	Asia	six-row	spring
P0462	IGB1133	AUS	Australia	two-row	spring
P0469	IGB1234	AUS	Australia	two-row	spring
P0475	IGV3-313(ATLAS46)	USA	North America	six-row	spring
P0476	Ilka	DEU	Europe	two-row	spring
P0477	Inari	FIN	Europe	two-row	spring
P0478	INDIANDWARF(CIho13994)	USA	North America	six-row	spring
P0479	IshukuShirazu	JPN	Asia	two-row	winter
P0481	Jessica	CZE	Europe	two-row	spring
P0482	Jubilant	SVK	Europe	two-row	spring
P0483	Jyoti-PI428399	IND	Asia	six-row	spring
P0484	KalkreutherFruhe	DEU	Europe	six-row	winter
P0485	Kaputar	AUS	Australia	two-row	spring
P0487	KASTICKY	CZE	Europe	two-row	spring
P0490	Keel	AUS	Australia	two-row	spring
P0495	Kinukei18	JPN	Asia	two-row	spring
P0496	Kinukei19	JPN	Asia	two-row	spring
P0499	KLAXON	GBR	Europe	two-row	spring
P0504	Krona	DEU	Europe	two-row	spring
P0505	KRYSTAL(Mla13)	YUG	Europe	two-row	winter
P0507	Kustaa	SWE	Europe	two-row	spring
P0508	Kyle/Snm/Ulm	AUS	Australia	two-row	spring
P0511	Lacey	USA	North America	six-row	spring
P0512	LA-MESITA	MEX	North America	six-row	spring
P0513	Landlord	GBR	Europe	two-row	spring
P0515	Langstrand0102(NGB02784)	FIN	Europe	six-row	winter
P0517	Larker	USA	North America	six-row	spring
P0510	LaTrobe	AUS	Australia	two-row	spring
P0518	Legacy	USA	North America	six-row	spring
P0521	Lindwall	AUS	Australia	two-row	spring
P0525	LOCEB-30	MEX	North America	two-row	spring
P0526	Lockyer	AUS	Australia	two-row	spring
P0531	Luxor	CZE	Europe	six-row	winter
P0537	Mackay	AUS	Australia	two-row	spring
P0538	Macquarie	AUS	Australia	two-row	spring
P0539	Magda*	NLD	Europe	two-row	spring
P0541	Maltine	NLD	Europe	two-row	spring
P0543	MANLEY	CAN	North America	two-row	spring
P0544	Maresi	DEU	Europe	two-row	spring
P0546	Maritime	AUS	Australia	two-row	spring
P0550	MC9924-012	CAN	North America	two-row	winter
P0555	MC9939-016	CAN	North America	two-row	winter
P0559	Merit	CAN	North America	two-row	spring
P0561	MisatoGolden	JPN	Asia	two-row	winter
P0565	MNBrite	USA	North America	six-row	spring
P0570	Moondyne	AUS	Australia	two-row	spring
P0572	Morex	USA	North America	six-row	spring
P0575	MoroccanLandrace	MAR	Africa	six-row	spring
P0573	Morovian	USA	North America	six-row	spring
P0576	Mosane	BEL	Europe	two-row	spring
P0581	Natasha	FRA	Europe	two-row	spring
P0588	ND23265	USA	North America	two-row	nd
P0589	ND23275	USA	North America	two-row	nd
P0592	Newdale	CAN	North America	two-row	spring
P0594	NirasakiNijo9	JPN	Asia	two-row	spring
P0595	NITRANSKY-EXPORTNI	CSK	Europe	two-row	spring
P0602	NRB08308	AUS	Australia	two-row	spring
P0606	O'Connor	AUS	Australia	two-row	spring
P0607	OHARA	AUT	Europe	two-row	spring
P0609	OLIVEROSLITORALMAG	ARG	South America	six-row	spring
P0610	Olsok	CZE	Europe	six-row	spring
P0611	Onslow	AUS	Australia	two-row	spring
P0613	Optic	GBR	Europe	two-row	spring
P0615	ORBIT	SVK	Europe	two-row	spring
P0616	OTIS	USA	North America	two-row	spring
P0619	Oxford	AUS	Australia	two-row	spring
P0621	Patty	FRA	Europe	two-row	spring
P0625	PEWTER	DNK	Europe	two-row	spring
P0626	PICCOLO	NLD	Europe	two-row	spring
P0631	Prior	AUS	Australia	two-row	spring
P0634	PROCTOR	GBR	Europe	two-row	spring
P0635	Prosa	AUT	Europe	two-row	spring
P0636	PROSKOVCUV-HANACKY	CSK	Europe	two-row	spring
P0638	Quasar	AUS	Australia	two-row	spring
P0640	RAPID	CZE	Europe	two-row	spring
P0641	Rawson	USA	North America	two-row	spring
P0643	REGENT	GBR	Europe	two-row	spring
P0645	Regina	DEU	Europe	two-row	winter
P0646	RETROARUPOBV-9225	MEX	North America	two-row	spring
P0648	Riviera	GBR	Europe	two-row	spring
P0650	Roe	AUS	Australia	two-row	spring
P0652	Roxanna	CZE	Europe	two-row	spring
P0655	RUSSIA24	RUS	Europe	two-row	spring
P0657	Ruti	CZE	Europe	two-row	spring
P0661	SANALTA	CAN	North America	two-row	spring
P0662	SatsukiNijo	JPN	Asia	two-row	spring
P0663	SB01513	GBR	Europe	two-row	spring
P0668	Scarlett	DEU	Europe	two-row	spring
P0670	Schooner	AUS	Australia	two-row	spring
P0674	SE612.01	DEU	Europe	two-row	nd
P0676	SEEBE	MEX	North America	two-row	spring
P0682	Shepherd	AUS	Australia	two-row	spring
P0683	Sherpa	GBR	Europe	two-row	spring
P0684	Shinonome	JPN	Asia	six-row	spring
P0687	SHYRI	MEX	North America	two-row	spring
P0688	SIMBA	SWE	Europe	two-row	spring
P0689	Sissy	DEU	Europe	two-row	spring
P0690	Skiff	AUS	Australia	two-row	spring
P0692	Sloop	AUS	Australia	two-row	spring
P0693	SloopSA	AUS	Australia	two-row	spring
P0694	SloopVIC	AUS	Australia	two-row	spring
P0697	SM02544	CAN	North America	two-row	winter
P0698	SM060103	CAN	North America	two-row	winter
P0709	SpanishLandrace-355	ESP	Europe	six-row	nd
P0714	Steffi	DEU	Europe	two-row	spring
P0716	Stellar-ND	USA	North America	six-row	spring
P0718	Stirling	AUS	Australia	two-row	spring
P0719	STUPICKYHANACKY	CZE	Europe	two-row	spring
P0720	Sublette	USA	North America	two-row	spring
P0723	SVB21	ZAF	Africa	two-row	nd
P0724	SVB24(lfrR)	ZAF	Africa	two-row	nd
P0726	SVC5	ZAF	Africa	two-row	nd
P0729	Tadmor	SYR	Middle East	two-row	winter
P0730	Tallon	AUS	Australia	two-row	spring
P0731	TANKARD	CAN	North America	two-row	spring
P0732	Tantangara	AUS	Australia	two-row	spring
P0736	Tilga	AUS	Australia	two-row	spring
P0739	Tocada	DEU	Europe	two-row	spring
P0740	Toddy	GBR	Europe	two-row	spring
P0741	Tolar	NLD	Europe	two-row	spring
P0743	Tore*	NOR	Europe	two-row	spring
P0744	Torrens	AUS	Australia	two-row	spring
P0751	TR07393	CAN	North America	two-row	spring
P0753	TR08394	CAN	North America	two-row	spring
P0763	TR257	CAN	North America	two-row	spring
P0768	TR638	CAN	North America	two-row	spring
P0769	TR645	CAN	North America	two-row	spring
P0772	Tradition	CAN	North America	six-row	spring
P0773	Trait-d-Union	FRA	Europe	two-row	spring
P0776	TRIUMPH	AUS	Australia	two-row	spring
P0777	Tulla	AUS	Australia	two-row	spring
P0779	Unicorn	JPN	Asia	two-row	spring
P0780	UNION	DEU	Europe	two-row	spring
P0781	Urambie	AUS	Australia	two-row	winter
P0782	Ursa	CZE	Europe	two-row	spring
P0786	UWA94TK18-18	AUS	Australia	two-row	spring
P0788	UWA96T45-07-26	AUS	Australia	two-row	spring
P0794	Valeta	NLD	Europe	two-row	spring
P0795	VALTICKY	CSK	Europe	two-row	spring
P0796	VB0330	AUS	Australia	two-row	spring
P0800	VB0904	AUS	Australia	two-row	spring
P0801	VB0916	AUS	Australia	two-row	spring
P0806	VIC--8717	AUS	Australia	two-row	spring
P0808	Viva1	AUT	Europe	two-row	spring
P0809	Vlamingh	AUS	Australia	two-row	spring
P0810	VODKA	FRA	Europe	two-row	spring
P0813	VTAdmiral	AUS	Australia	two-row	spring
P0817	WABAR2228	AUS	Australia	two-row	spring
P0819	WABAR2234	AUS	Australia	two-row	spring
P0830	WABAR2347	AUS	Australia	two-row	spring
P0833	WABAR2378	AUS	Australia	two-row	spring
P0834	WABAR2411	AUS	Australia	two-row	spring
P0854	WB146	AUS	Australia	two-row	spring
P0858	WI2553	AUS	Australia	two-row	spring
P0862	WI2868	AUS	Australia	two-row	spring
P0885	WI4584	AUS	Australia	two-row	spring
P0925	WI4843	AUS	Australia	two-row	spring
P0931	WI4870	AUS	Australia	two-row	spring
P0943	WI4893	AUS	Australia	two-row	spring
P0944	Wicket	GBR	Europe	two-row	spring
P0952	WVB35	ZAF	Africa	two-row	nd
P0953	WVC3	ZAF	Africa	two-row	nd
P0959	XVE7	ZAF	Africa	two-row	nd
P0960	XVH11	ZAF	Africa	two-row	nd
P0962	Yambla	AUS	Australia	two-row	spring
P0967	Z019Q008R	USA	North America	two-row	nd
P0972	ZBC9322	MEX	North America	two-row	spring
P0974	ZBC934	MEX	North America	two-row	spring
nd = no data

## Sheet: Supplementary Table S2
Supplementary Table S2: Performance of barley accessions under low-N as low-N sensitive, moderately tolerant and tolerant based on relative shoot dry weight (RSDW)
Phenology ID	Variety	Performance under low-N
P0512	LA-MESITA	Sensitive
P0216	Caminant	Sensitive
P0086	ACMETCALFE	Sensitive
P0265	Clarity	Sensitive
P0615	ORBIT	Sensitive
P0931	WI4870	Sensitive
P0531	Luxor	Sensitive
P0330	EMIRCOMPLEX	Sensitive
P0858	WI2553	Sensitive
P0652	Roxanna	Sensitive
P0352	Foster	Sensitive
P0810	VODKA	Sensitive
P0115	ASPLUNDSVALOF	Sensitive
P0570	Moondyne	Sensitive
P0944	Wicket	Sensitive
P0619	Oxford	Sensitive
P0105	Apex	Sensitive
P0304	Delibes	Sensitive
P0616	OTIS	Sensitive
P0386	Hamelin	Sensitive
P0763	TR257	Sensitive
P0349	Flinders	Sensitive
P0809	Vlamingh	Sensitive
P0517	Larker	Sensitive
P0335	Excel	Sensitive
P0247	Cellar	Sensitive
P0490	Keel	Sensitive
P0753	TR08394	Sensitive
P0306	Dera	Sensitive
P0561	MisatoGolden	Sensitive
P0238	CDCReserve	Sensitive
P0263	Clara	Sensitive
P0646	RETROARUPOBV-9225	Sensitive
P0697	SM02544	Sensitive
P0817	WABAR2228	Sensitive
P0830	WABAR2347	Sensitive
P0657	Ruti	Sensitive
P0275	CLE235	Sensitive
P0609	OLIVEROSLITORALMAG	Sensitive
P0885	WI4584	Sensitive
P0959	XVE7	Sensitive
P0155	BM9311-35	Sensitive
P0573	Morovian	Sensitive
P0291	CORGI	Sensitive
P0613	Optic	Sensitive
P0481	Jessica	Sensitive
P0476	Ilka	Sensitive
P0518	Legacy	Sensitive
P0716	Stellar-ND	Sensitive
P0611	Onslow	Sensitive
P0709	SpanishLandrace-355	Sensitive
P0575	MoroccanLandrace	Sensitive
P0331	EMPRESS	Sensitive
P0800	VB0904	Sensitive
P0779	Unicorn	Sensitive
P0337	Fairview	Sensitive
P0423	HuMai4Hao	Sensitive
P0508	Kyle/Snm/Ulm	Sensitive
P0192	C01P-66	Moderately tolerant
P0773	Trait-d-Union	Moderately tolerant
P0417	Heriot	Moderately tolerant
P0495	Kinukei18	Moderately tolerant
P0118	Atem	Moderately tolerant
P0813	VTAdmiral	Moderately tolerant
P0121	Atribut	Moderately tolerant
P0670	Schooner	Moderately tolerant
P0285	Compass	Moderately tolerant
P0952	WVB35	Moderately tolerant
P0087	ACOxbow	Moderately tolerant
P0178	Brindabella	Moderately tolerant
P0496	Kinukei19	Moderately tolerant
P0104	Antarctica01	Moderately tolerant
P0719	STUPICKYHANACKY	Moderately tolerant
P0139	Barke	Moderately tolerant
P0167	BoaFe	Moderately tolerant
P0592	Newdale	Moderately tolerant
P0372	Granifen	Moderately tolerant
P0400	Havanna	Moderately tolerant
P0336	Expres	Moderately tolerant
P0515	Langstrand0102(NGB02784)	Moderately tolerant
P0334	EUROPA	Moderately tolerant
P0230	CDCDolly	Moderately tolerant
P0572	Morex	Moderately tolerant
P0663	SB01513	Moderately tolerant
P0479	IshukuShirazu	Moderately tolerant
P0862	WI2868	Moderately tolerant
P0661	SANALTA	Moderately tolerant
P0149	Bellini	Moderately tolerant
P0819	WABAR2234	Moderately tolerant
P0636	PROSKOVCUV-HANACKY	Moderately tolerant
P0606	O'Connor	Moderately tolerant
P0769	TR645	Moderately tolerant
P0555	MC9939-016	Moderately tolerant
P0546	Maritime	Moderately tolerant
P0625	PEWTER	Moderately tolerant
P0854	WB146	Moderately tolerant
P0347	Flagship	Moderately tolerant
P0953	WVC3	Moderately tolerant
P0130	B583	Moderately tolerant
P0266	Clark	Moderately tolerant
P0782	Ursa	Moderately tolerant
P0537	Mackay	Moderately tolerant
P0960	XVH11	Moderately tolerant
P0242	CDCTISDALE	Moderately tolerant
P0726	SVC5	Moderately tolerant
P0294	CzechLandrace-243	Moderately tolerant
P0292	Cowabbie	Moderately tolerant
P0744	Torrens	Moderately tolerant
P0361	GALAN	Moderately tolerant
P0262	CI9819	Moderately tolerant
P0731	TANKARD	Moderately tolerant
P0307	Derkado	Moderately tolerant
P0353	FR/DAYTON	Moderately tolerant
P0806	VIC--8717	Moderately tolerant
P0650	Roe	Moderately tolerant
P0943	WI4893	Moderately tolerant
P0662	SatsukiNijo	Moderately tolerant
P0244	CDCYorkton	Moderately tolerant
P0645	Regina	Moderately tolerant
P0777	Tulla	Moderately tolerant
P0833	WABAR2378	Moderately tolerant
P0237	CDCMeredith	Moderately tolerant
P0234	CDCKendall	Moderately tolerant
P0565	MNBrite	Moderately tolerant
P0389	Hannan	Moderately tolerant
P0621	Patty	Moderately tolerant
P0169	BOLRON	Moderately tolerant
P0692	Sloop	Moderately tolerant
P0408	HB382	Moderately tolerant
P0355	France30161	Moderately tolerant
P0682	Shepherd	Moderately tolerant
P0736	Tilga	Moderately tolerant
P0469	IGB1234	Moderately tolerant
P0456	IG16957	Moderately tolerant
P0638	Quasar	Moderately tolerant
P0732	Tantangara	Moderately tolerant
P0626	PICCOLO	Moderately tolerant
P0413	Heart	Moderately tolerant
P0171	BOWMAN	Moderately tolerant
P0303	Defra	Moderately tolerant
P0477	Inari	Moderately tolerant
P0390	HANNCHEN	Moderately tolerant
P0739	Tocada	Moderately tolerant
P0255	CHERI	Moderately tolerant
P0740	Toddy	Moderately tolerant
P0399	Hassan	Moderately tolerant
P0277	CLE268	Moderately tolerant
P0394	HARRINGTON	Moderately tolerant
P0343	Finniss	Moderately tolerant
P0788	UWA96T45-07-26	Moderately tolerant
P0418	Heris	Moderately tolerant
P0327	EB1111	Moderately tolerant
P0967	Z019Q008R	Moderately tolerant
P0348	Fleet	Moderately tolerant
P0730	Tallon	Moderately tolerant
P0602	NRB08308	Moderately tolerant
P0643	REGENT	Moderately tolerant
P0233	CDCGuardian	Moderately tolerant
P0589	ND23275	Moderately tolerant
P0743	Tore*	Moderately tolerant
P0333	EUNOVA	Moderately tolerant
P0751	TR07393	Moderately tolerant
P0635	Prosa	Moderately tolerant
P0183	Buloke	Moderately tolerant
P0576	Mosane	Moderately tolerant
P0350	FORMULA	Moderately tolerant
P0513	Landlord	Moderately tolerant
P0373	Grimmett	Moderately tolerant
P0674	SE612.01	Moderately tolerant
P0768	TR638	Moderately tolerant
P0505	KRYSTAL(Mla13)	Moderately tolerant
P0720	Sublette	Moderately tolerant
P0550	MC9924-012	Moderately tolerant
P0133	B697	Moderately tolerant
P0261	CI5791	Moderately tolerant
P0395	Harriot	Moderately tolerant
P0483	Jyoti-PI428399	Moderately tolerant
P0435	I90-137-1	Moderately tolerant
P0974	ZBC934	Moderately tolerant
P0161	BM9752D-125	Moderately tolerant
P0795	VALTICKY	Moderately tolerant
P0786	UWA94TK18-18	Moderately tolerant
P0559	Merit	Moderately tolerant
P0132	B645	Moderately tolerant
P0714	Steffi	Moderately tolerant
P0780	UNION	Moderately tolerant
P0581	Natasha	Moderately tolerant
P0694	SloopVIC	Moderately tolerant
P0398	HarunaNijo	Moderately tolerant
P0684	Shinonome	Moderately tolerant
P0145	BEARPAW	Moderately tolerant
P0594	NirasakiNijo9	Moderately tolerant
P0641	Rawson	Moderately tolerant
P0610	Olsok	Moderately tolerant
P0683	Sherpa	Moderately tolerant
P0324	DVORAN	Moderately tolerant
P0251	Charger	Moderately tolerant
P0690	Skiff	Moderately tolerant
P0521	Lindwall	Moderately tolerant
P0484	KalkreutherFruhe	Moderately tolerant
P0462	IGB1133	Moderately tolerant
P0253	Charlottetown	Moderately tolerant
P0316	DIABAS	Moderately tolerant
P0175	Braemar	Moderately tolerant
P0687	SHYRI	Moderately tolerant
P0668	Scarlett	Moderately tolerant
P0676	SEEBE	Moderately tolerant
P0689	Sissy	Moderately tolerant
P0772	Tradition	Moderately tolerant
P0487	KASTICKY	Moderately tolerant
P0250	Chapais	Moderately tolerant
P0972	ZBC9322	Moderately tolerant
P0541	Maltine	Moderately tolerant
P0329	Edda	Moderately tolerant
P0801	VB0916	Moderately tolerant
P0776	TRIUMPH	Moderately tolerant
P0284	Commander	Moderately tolerant
P0808	Viva1	Moderately tolerant
P0146	Beatrice	Moderately tolerant
P0482	Jubilant	Moderately tolerant
P0282	CM67	Moderately tolerant
P0925	WI4843	Moderately tolerant
P0451	I97-415	Moderately tolerant
P0212	C98Prel-60	Moderately tolerant
P0655	RUSSIA24	Moderately tolerant
P0162	BM9857-263-1	Tolerant
P0181	BT634-ACLacombe	Tolerant
P0538	Macquarie	Tolerant
P0781	Urambie	Tolerant
P0693	SloopSA	Tolerant
P0631	Prior	Tolerant
P0374	Grout	Tolerant
P0648	Riviera	Tolerant
P0342	FILIPPA	Tolerant
P0367	Gimpel	Tolerant
P0962	Yambla	Tolerant
P0796	VB0330	Tolerant
P0239	CDCSisler	Tolerant
P0834	WABAR2411	Tolerant
P0376	GSHO2483(in XV2334-6R from Indian Dwarf, slender dwarf 5 mutant)	Tolerant
P0152	Binalong	Tolerant
P0729	Tadmor	Tolerant
P0723	SVB21	Tolerant
P0724	SVB24(lfrR)	Tolerant
P0453	ICB104039	Tolerant
P0543	MANLEY	Tolerant
P0243	CDCUNITY	Tolerant
P0741	Tolar	Tolerant
P0634	PROCTOR	Tolerant
P0526	Lockyer	Tolerant
P0544	Maresi	Tolerant
P0088	ADAGIO	Tolerant
P0191	C01P-53	Tolerant
P0128	B531	Tolerant
P0794	Valeta	Tolerant
P0103	Annika	Tolerant
P0504	Krona	Tolerant
P0475	IGV3-313(ATLAS46)	Tolerant
P0271	CLE203	Tolerant
P0607	OHARA	Tolerant
P0640	RAPID	Tolerant
P0688	SIMBA	Tolerant
P0525	LOCEB-30	Tolerant
P0241	CDCStratus	Tolerant
P0478	INDIANDWARF(CIho13994)	Tolerant
P0539	Magda*	Tolerant
P0219	CARAVELA	Tolerant
P0177	Bridge	Tolerant
P0499	KLAXON	Tolerant
P0718	Stirling	Tolerant
P0371	GrangeR	Tolerant
P0419	Hindmarsh	Tolerant
P0150	Bentley	Tolerant
P0148	BEKA	Tolerant
P0588	ND23265	Tolerant
P0698	SM060103	Tolerant
P0510	LaTrobe	Tolerant
P0485	Kaputar	Tolerant
P0101	Andre	Tolerant
P0511	Lacey	Tolerant
P0507	Kustaa	Tolerant
P0595	NITRANSKY-EXPORTNI	Tolerant

## Sheet: Supplementary Table S3
Supplementary Table S3:Performance of some selected barley genotypes based on relative shoot dry biomass under low N.
Genotype	RSDW≤55 %	Genotype	RSDW 55 - 75 %	Genotype	RSDW≥75%
LA-MESITA	28.9	Kinukei18	56.6	Bridge	75.5
Caminant	34.1	Atribut	57.1	KLAXON	75.6
ACMETCALFE	35.2	Schooner	57.2	Stirling	76.9
Clarity	37.7	Compass	57.4	GrangeR	79.5
ORBIT	40.9	Brindabella	57.9	Hindmarsh	82.4
WI4870	42.7	Barke	58.4	Bentley	84.7
Luxor	43.9	Granifen	58.7	BEKA	84.8
EMIRCOMPLEX	45.7	Morex	59.6	ND23265	86.9
WI2553	46.8	PEWTER	60.9	SM060103	87.3
Roxanna	47.5	CDCYorkton	62.9	LaTrobe	88.7
Foster	47.7	CDCMeredith	63.3	Kaputar	96.7
VODKA	48	Sloop	64.3	Andre	98.5
ASPLUNDSVALOF	48.6	France30161	64.5	Lacey	112.9
Moondyne	50.1	Heart	65.9	Kustaa	115.8
Wicket	51	Buloke	68.4
Oxford	51.8	FORMULA	68.7
Apex	52	Rawson	72.5
Delibes	52.1	Charger	72.9
OTIS	52.8	SHYRI	73.6
Hamelin	53
TR257	53.1
Flinders	53.5
Vlamingh	53.5
Larker	54.6

## Sheet: Supplementary Table S4
Supplementary Table S4: Correlation coefficients of mean values of phenotypic traits between the two treatments in 2018 and 2019
A
2018	SL-NormalN	RL-NormalN	SDW-NormalN	RDW-NormalN	LN-NormalN	TN-NormalN
SL-LowN	.524**	.243**	.261**	.181**	0.0800481	0.0686409
RL-LowN	.171**	.497**	.223**	.204**	.202**	.135*
SDW-LowN	.283**	.258**	.517**	.379**	.378**	.274**
RDW-LowN	.122*	.140*	.408**	.378**	.332**	.216**
LN-LowN	0.0192403	.174**	.323**	.195**	.461**	.351**
TN-LowN	0.00489086	.131*	.253**	.198**	.335**	.271**
B
2019	SL-NormalN	RL-NormalN	SDW-NormalN	RDW-NormalN	LN-NormalN	TN-NormalN
SL-LowN	.647**	.190**	.392**	.245**	.212**	.219**
RL-LowN	.526**	.815**	.458**	.570**	.411**	.335**
SDW-LowN	.570**	.400**	.746**	.578**	.586**	.545**
RDW-LowN	.526**	.582**	.759**	.780**	.645**	.550**
LN-LowN	.256**	.352**	.550**	.466**	.602**	.558**
TN-LowN	.198**	.282**	.468**	.411**	.482**	.495**
C
	RSL 2019	RRL 2019	RSDW 2019	RRDW 2019
RSL 2018	0.021	-0.047	0.087	0.07
RRL 2018	-0.103	0.062	0.03	0.001
RSDW 2018	-0.008	-0.003	.163*	0.089
RRDW 2018	-0.049	0.058	0.036	0.047
D
Low-N	SDW 2019	RDW 2019	SL 2019	RL 2019
SDW 2018	.308**	.201**	.224**	.147*
RDW 2018	.177**	.230**	0.106651	0.0990799
SL 2018	.206**	0.0920674	.349**	0.0825293
RL 2018	0.0457687	0.0483372	0.0599148	.298**
Note: Below the diagonals (A) are the correlation coefficients of phenotypic traits under low-N in 2018, (B) are the correlation coefficients of phenotypic traits under low-N in 2019, (C) are the correlation coefficients of relative values of the key phenotypic traits in 2018, (D) are the correlation coefficients of the key phenotypic traits in 2018 and above the diagonals, (A) are the correlatio…

## Sheet: Supplementary Table S5
Supplementary Table S5A:MTA regions identified for NUE related traits in 2018
Trait	MTAs in 10MB linked regions	Position	p	q	-log10(p)	MarkerR2	Marker	No of haplotypes per locus	Haplotypes	No of varities per haplotype	NUE	Beneficial haplotype conferring to high NUE	Chr	Gene/s	Annotation
RSDW	MTA1	17313420	5.1224e-07	0.0156458	6.29053	0.13824	L1H017313420	4	-T	195	0.54	TT	1	HORVU1Hr1G007950.1, HORVU1Hr1G007930.1, HORVU1Hr1G007910.1, HORVU1Hr1G008110.1	Pectin acetylesterase 10, Receptor kinase 1, MATE efflux family protein, B3 domain-containing protein
RSDW		17313985	2.0871e-07	0.00980743	6.68046	0.14964	L1H017313985		-C	1	0.64
									TC	1	0.59
									TT	1	1.75
RSDW	MTA2	107422768	3.387e-12	2.06905e-06	11.4702	0.27205	L2H107422768	2	CC	231	0.54	TT	2	HORVU2Hr1G029700.1	Cytochrome b561 and DOMON domain-containing protein
RRDW			1.5406e-07	0.0104569	6.81231	0.14333			TT	1	1.75
RSDW	MTA3	147608174	1.0393e-06	0.0218926	5.98326	0.11443	L3H147608174	2	AG	240	0.54	GA	3	HORVU3Hr1G030580.1, HORVU3Hr1G030570.1, HORVU3Hr1G030560.1, HORVU3Hr1G030550.1	Replication protein A 32 kDa subunit B, Far-red impaired response protein-like protein, heavy metal atpase 5, Chromosome 3B, genomic scaffold, cultivar Chinese Spring
RSDW		147608182	1.051e-06	0.0214011	5.9784	0.11431	L3H147608182		GA	2	1.13
RSDW	MTA4	695384685	7.0082e-07	0.0178382	6.15439	0.11999	L3H695384685	2	GG	1	1.25	n/a	3	HORVU3Hr1G116150.1-.20	BnaA01g30480D protein
RRDW			9.0589e-07	0.0212842	6.04292	0.11953			--	241	0.54
RSDW	MTA5	389121958	1.1865e-11	1.44962e-06	10.9257	0.23738	L4H389121958	4	AG	223	0.54	CA	4	HORVU4Hr1G048210.1	Unknown protein
RRDW			3.9876e-07	0.0143291	6.39929	0.12984			AA	1	0.59
RSDW		389122083	2.3739e-07	0.0103583	6.62454	0.13241	L4H389122083		CA	1	1.75
									CG	1	1
RSDW	MTA6	636132230	4.3443e-07	0.0147436	6.36208	0.12246	L4H636132230	2	GG	245	0.55	AA	4	HORVU4Hr1G087080.1	undescribed protein
RRDW			5.8124e-07	0.016908	6.23564	0.11788			AA	1	1.25
RSDW	MTA7	118241817	1.2613e-07	0.00963127	6.89918	0.18129	C5H118241817	-	-	-	-	n/a	5	HORVU5Hr1G022760.1, HORVU5Hr1G022790.1	Solute carrier family 40 member 1, Purple acid phosphatase 10
RSDW	MTA8	4021832	2.3974e-07	0.00915326	6.62026	0.12673	L6H004021832	2	CC	245	0.54	GG	6	HORVU6Hr1G001200.8, HORVU6Hr1G001270.1	Receptor-like protein kinase 1, Aldehyde dehydrogenase family 3 member F1
RSDW		4021834	2.3974e-07	0.00976348	6.62026	0.12673	L6H004021834		GG	2	1.16
RSDW	MTA9	484044374	9.2253e-07	0.0208724	6.03502	0.11223	D6H484044374	-	-	-	-	n/a	6	HORVU6Hr1G069690.2	Basic helix-loop-helix (bHLH) DNA-binding superfamily protein
RSDW	MTA10	4016220	2.8562e-06	0.0415427	5.54421	0.10423	L7H004016220	-	-	-	-	n/a	7	HORVU7Hr1G001940.1, HORVU7Hr1G001960.1, HORVU7Hr1G002010.4, HORVU7Hr1G002020.1, HORVU7Hr1G002050.1, HORVU7Hr1G002060.1	Undescribed protein, Undescribed protein, Leucine-rich repeat receptor-like protein kinase family protein, Protein of unknown function (DUF594), Membrane protein, putative, Ribosomal protein L6 family
RSDW	MTA11	140721275	4.8115e-07	0.0154697	6.31772	0.13052	L7H140721275	2	TT	238	0.55	CC	7	HORVU7Hr1G044850.1	WW domain-containing protein, putative isoform 3
RRDW			6.8728e-07	0.0182541	6.16287	0.1245			CC	1	1.25
RSDW	MTA12	229985397	3.7957e-12	1.15936e-06	11.4207	0.2472	L7H229985397	2	AA	235	0.54	GG	7	HORVU7Hr1G055900.1	Eukaryotic protein of unknown function (DUF914)
RRDW			1.8276e-07	0.00930369	6.73812	0.13366			GG	1	1.75
RSDW	MTA13	600147760	1.5429e-06	0.0261813	5.81166	0.10792	C7H600147760	-	-	-	-	n/a	7	HORVU7Hr1G098550.1, HORVU7Hr1G099250.1, HORVU7Hr1G099260.2	high affinity nitrate transporter 2.7, Protein VERNALIZATION INSENSITIVE 3, Receptor kinase 1
RSDW	MTA14	617670049	4.2673e-12	6.51701e-07	11.3698	0.24067	L7H617670049	2	AT	234	0.55	CC	7	HORVU7Hr1G105780.1, HORVU7Hr1G105800.1	Undescribed protein, Undescribed protein
RRDW			1.6157e-07	0.0089727	6.79164	0.13387			CC	1	1.75
RSDW		617670050	4.2673e-12	8.68935e-07	11.3698	0.24067	L7H617670050
RRDW			1.6157e-07	0.00986997	6.79164	0.13387
RSDW	MTA15	640047456	1.3069e-06	0.0241927	5.88376	0.12192	L7H640047456	2	CCA	222	0.55	ATG	7	HORVU7Hr1G114720.1, HORVU7Hr1G114730.1, HORVU7Hr1G114740.1	Histone superfamily protein, F-box domain containing protein, Histone superfamily protein
RRDW			1.7899e-06	0.0266686	5.74717	0.1224			ATG	1	1.25
RSDW		640047457	1.3069e-06	0.0249487	5.88376	0.12192	L7H640047457
RRDW			1.7899e-06	0.0273353	5.74717	0.1224
RSDW		640047480	1.3059e-06	0.0257338	5.88409	0.12171	L7H640047480
RRDW			1.7823e-06	0.0279172	5.74902	0.12109
Supplementary table S5B: MTA regions identified for NUE related traits in 2019
RRDW	MTA1	17313264	2.9471e-07	0.000750135	6.53061	0.11061	L1H017313264	4	AC	4	0.74	CC	1	HORVU1Hr1G007950.1, HORVU1Hr1G007930.1	Pectin acetylesterase 10, Receptor kinase 1
RSDW			1.9092e-08	7.19933e-05	7.71915	0.13258			AT	1	0.68
RRDW		21638670	5.2211e-07	0.00121735	6.28224	0.10633	L1H021638670		CC	243	0.78			HORVU1Hr1G009610.1	Leucine-rich repeat receptor-like protein kinase family protein
RSDW			2.5079e-07	0.000646424	6.60069	0.11074			CT	6	0.74
Rtillers			1.8057e-05	0.0229805	4.74335	0.07783
RLeaves	MTA2	41545487	4.562e-05	0.0473147	4.34084	0.0692	L1H041545487	2	G	263	0.79	G	1	HORVU1Hr1G014880.1-.3	Unknown function
RRDW			4.8006e-09	2.40376e-05	8.3187	0.14711			A	4	0.77
RSDW			8.6892e-11	7.47614e-07	10.061	0.18081
RLeaves	MTA3	112101141	1.4854e-07	0.000420093	6.82816	0.11866	L1H112101141	2	G	264	0.79	G	1	HORVU1Hr1G024420.1-.10	Asparagine--tRNA ligase
RRDW			6.9589e-12	7.20517e-08	11.1575	0.20738			T	3	0.77
RSDW			2.606e-13	3.53767e-09	12.584	0.2353
RSL			3.2447e-05	0.0350818	4.48883	0.07427
RLeaves	MTA4	210051769	4.3027e-09	2.20877e-05	8.36626	0.14806	L1H210051769	5	AGGT	2	1.18	AGGT	1	HORVU1Hr1G033980.1	Transcription factor bHLH140
RRDW			2.1215e-05	0.0258679	4.67336	0.07506			AATC	1	1.02
RSDW			3.4975e-11	3.33836e-07	10.4562	0.18931			TATC	6	0.84
Rtillers			1.6297e-10	1.3274e-06	9.78789	0.1791			TGGT	243	0.78
RLeaves		217665220	6.415e-07	0.00146224	6.1928	0.10416	L1H217665220		TGGC	2	0.99
RRL			9.6112e-07	0.00209689	6.01722	0.10674
RSDW			4.578e-06	0.00787777	5.33932	0.08625
Rtillers			1.1338e-08	4.74394e-05	7.94546	0.13978
RLeaves		217665224	9.5748e-08	0.000289557	7.01887	0.12025	L1H217665224
RRDW			2.4677e-05	0.0283892	4.60771	0.07364
RRL			1.7074e-07	0.000465632	6.76766	0.12132
RSDW			6.9111e-08	0.000214307	7.16045	0.12146
Rtillers			1.7182e-08	6.64313e-05	7.76493	0.13587
RLeaves		217665227	9.7551e-08	0.000292117	7.01077	0.11999	L1H217665227
RRDW			2.43e-05	0.0280083	4.61439	0.07374
RRL			1.7207e-07	0.000467174	6.76429	0.12108
RSDW			6.7566e-08	0.000210585	7.17027	0.12159
Rtillers			1.7455e-08	6.70623e-05	7.75808	0.13565
RLeaves	MTA5	321264941	2.5979e-05	0.0296636	4.58538	0.11737	C1H321264941	2	C	133	0.78	T	1	HORVU1Hr1G044000.1	Plant basic secretory protein (BSP) family protein
RRDW			2.8639e-09	1.57613e-05	8.54304	0.19853			T	3	0.85
RSDW			8.0904e-11	7.1627e-07	10.092	0.20609
RLeaves	MTA6	457592808	1.051e-06	0.00224488	5.9784	0.10695	L1H457592808	2	A	12	0.92	A	1	HORVU1Hr1G063880.1	Protein of unknown function, DUF538
RSDW			3.9633e-05	0.0418876	4.40194	0.06929			G	231	0.78
Rtillers			4.0825e-06	0.00718708	5.38907	0.09314
RLeaves	MTA7	516988181	9.3487e-06	0.013533	5.02925	0.0884	L1H516988181	5	GT-	230	0.78	GT	1	HORVU1Hr1G077290.1, HORVU1Hr1G077320, HORVU1Hr1G078750	Transmembrane protein 56-B, Carboxypeptidase Y, Protein kinase superfamily protein
RRDW			2.6302e-14	4.34253e-10	13.58	0.26901			GTT	1	0.64
RSDW			1.4999e-16	3.81775e-12	15.8239	0.31337			GGT	4	0.73
Rtillers			2.8468e-06	0.00535093	5.54564	0.10003			GG-	2	0.59
RLeaves		525842205	2.8515e-05	0.0316714	4.54493	0.0799	L1H525842205		TT-	2	0.62			HORVU1Hr1G080600, HORVU1Hr1G080630	Serine/threonine-protein kinase, Ubiquitin-like superfamily protein
RRDW			2.324e-07	0.000609307	6.63376	0.12355
RSDW			1.2692e-09	8.07634e-06	8.89647	0.15878
RLeaves		525842219	3.5341e-06	0.00634974	5.45172	0.09787	L1H525842219
RRDW			3.1179e-08	0.000108219	7.50614	0.1425
RSDW			1.321e-10	1.0905e-06	9.8791	0.17905
Rtillers			1.6876e-05	0.021658	4.77273	0.0849
RRDW	MTA8	548193806	5.1842e-10	3.59878e-06	9.28532	0.16635	D1H548193806	5	GCTAGAG	225	0.79	GCTAGAG	1	HORVU1Hr1G091370.1	Histone H2B.3
RSDW			2.623e-11	2.54339e-07	10.5812	0.19099			ACTAGAG	3	0.6
RLeaves		549643683	3.0921e-06	0.00567238	5.50975	0.08941	D1H549643683		GCTACAG	6	0.74			HORVU1Hr1G092060.1-.3	Unknown function
RRDW			1.1214e-13	1.67083e-09	12.9502	0.24608			ATCGCAG	2	0.72
RSDW			4.1907e-16	9.14291e-12	15.3777	0.29773			GCTACGG	1	0.78
Rtillers			4.1558e-07	0.000999486	6.38135	0.10696
RLeaves		549755167	3.1208e-06	0.00569085	5.50573	0.08932	D1H549755167							HORVU1Hr1G092090.1	Undescribed protein
RRDW			1.1235e-13	1.6341e-09	12.9494	0.24606
RSDW			4.1933e-16	8.83311e-12	15.3774	0.29773
Rtillers			4.1291e-07	0.00099699	6.38414	0.10719
RLeaves		549784675	3.1097e-06	0.00568759	5.50728	0.08933	D1H549784675							HORVU1Hr1G092130.10, HORVU1Hr1G092110.1-.17	WRKY DNA-binding protein 23, Asparagine synthetase [glutamine-hydrolyzing] 2
RRDW			1.11e-13	1.69519e-09	12.9547	0.24606
RSDW			4.1224e-16	9.68574e-12	15.3848	0.29772
Rtillers			4.1149e-07	0.000997504	6.38564	0.10701
RRDW		549810050	8.9075e-06	0.0129557	5.05024	0.08179	D1H549810050
RSDW			1.4592e-06	0.00290357	5.83589	0.09545
RLeaves		553114285	2.5172e-05	0.0289043	4.59908	0.07421	L1H553114285							HORVU1Hr1G093480	tryptophan synthase alpha chain
RRDW			5.0008e-09	2.44391e-05	8.30096	0.14791
RSDW			1.8245e-09	1.05146e-05	8.73886	0.15369
Rtillers			1.599e-05	0.0206949	4.79615	0.07782
RRDW		557218707	5.6703e-06	0.00904405	5.24639	0.08731	L1H557218707							HORVU1Hr1G094990, HORVU1Hr1G095100	Protein kinase superfamily protein, ATP-dependent RNA helicase DeaD
RSDW			1.0678e-07	0.000318194	6.97151	0.11797
Rtillers			3.1749e-05	0.0344491	4.49827	0.07225
RLeaves	MTA9	858129	5.5479e-08	0.000175601	7.25587	0.1379	L2H000858129	2	A	4	0.9	A	2	HORVU2Hr1G000280	cysteine synthase C1
RRDW			3.6034e-07	0.000891192	6.44329	0.11137			G	240	0.79
RSDW			1.4686e-09	8.97138e-06	8.8331	0.15658
Rtillers			5.7425e-06	0.00908803	5.2409	0.08871
RLeaves	MTA10	32743063	2.9915e-05	0.0328678	4.52411	0.07116	L2H032743063	2	C	4	0.74	T	2	HORVU2Hr1G014930	receptor lectin kinase
RRDW			3.0899e-09	1.62721e-05	8.51006	0.15048			T	269	0.79
RSDW			4.8202e-11	4.5301e-07	10.3169	0.18565
Rtillers			4.3645e-05	0.0455758	4.36007	0.06881
RRDW	MTA11	68835493	7.1369e-07	0.00160286	6.14649	0.10295	C2H68835493	2	AGG	267	0.79	AGG	2	HORVU2Hr1G023180.1-.7	Protein FLOWERING LOCUS T
RSDW			1.5458e-07	0.000433164	6.81085	0.11431			GAA	7	0.74
RRDW		68835922	7.1369e-07	0.00159699	6.14649	0.10295	C2H68835922
RSDW			1.5458e-07	0.000431186	6.81085	0.11431
RRDW		68836383	7.2612e-07	0.00161888	6.13899	0.10288	C2H68836383
RSDW			1.5319e-07	0.000431247	6.81477	0.11443
RLeaves	MTA12	160145958	1.6971e-09	1.00653e-05	8.77029	0.16007	L2H160145958	2	A	258	0.79	G	2	HORVU2Hr1G036250.1	Zinc finger A20 and AN1 domain-containing stress-associated protein 9
RRDW			1.4044e-17	4.2896e-13	16.8525	0.34731			G	1	0.85
RRL			1.8546e-05	0.0234078	4.73175	0.08107
RSDW			4.9945e-22	3.39004e-17	21.3015	0.45044
RSL			2.9185e-05	0.0321815	4.53484	0.07696
Rtillers			1.938e-08	7.2631e-05	7.71265	0.13839
RLeaves	MTA13	222410476	1.9219e-09	1.09724e-05	8.71627	0.17567	L2H222410476	2	A	225	0.79	A	2	HORVU2Hr1G043510	Concanavalin A-like lectin protein kinase family protein
RRDW			5.7933e-18	2.08177e-13	17.2371	0.37018			G	2	0.75
RSDW			4.2678e-21	2.3701e-16	20.3698	0.44218
Rtillers			3.1916e-09	1.6664e-05	8.49599	0.17008
RLeaves	MTA14	338056307	2.0701e-06	0.00396421	5.68401	0.09349	L2H338056307	2	C	271	0.78	n/a	2	HORVU2Hr1G054810	Transmembrane protein 41B
RRDW			8.0797e-13	9.49178e-09	12.0926	0.22727			T	2	0.78
RSDW			4.8828e-16	9.94268e-12	15.3113	0.29656
Rtillers			6.7011e-06	0.0103113	5.17385	0.08439
RLeaves	MTA15	634350766	3.3515e-08	0.00011502	7.47476	0.14591	L2H634350766	2	TG	208	0.78	n/a	2	HORVU2Hr1G088640.1-.5	Caleosin-related family protein
RRDW			3.2035e-12	3.5581e-08	11.4944	0.24221			TA	6	0.79
RSDW			1.0773e-15	1.99425e-11	14.9677	0.30237			CG	3	0.77
Rtillers			1.0903e-08	4.62529e-05	7.96245	0.16611
RRDW		634350640	1.7523e-05	0.0223942	4.75639	0.08085	L2H634350640
RSDW			1.2895e-08	5.3225e-05	7.88958	0.14059
RLeaves			3.6672e-09	1.89849e-05	8.43567	0.149
RLeaves	MTA16	659882028	3.0848e-07	0.000781926	6.51077	0.10859	D2H659882028	2	C	274	0.79	T	2	HORVU2Hr1G093840	P-loop containing nucleoside triphosphate hydrolases superfamily protein
RRDW			3.4658e-14	5.57155e-10	13.4602	0.25751			T	2	0.82
RSDW			6.4556e-17	1.71461e-12	16.1901	0.31661
Rtillers			4.0047e-08	0.000135911	7.39743	0.127
RRDW	MTA17	734580611	1.6268e-07	0.000447648	6.78867	0.116	L2H734580611	2	C	265	0.79	G	2	HORVU2Hr1G115400, HORVU2Hr1G115380	SKP1-like 4, SKP1-like 4
RSDW			2.327e-09	1.31622e-05	8.6332	0.15148			G	4	0.83
Rtillers			2.6419e-05	0.0301098	4.57808	0.07289
RLeaves	MTA18	1082150	1.9914e-07	0.000535906	6.70084	0.1467	L3H001082150	2	G	240	0.79	A	3	HORVU3Hr1G000420.10, .29-.38, .42, .43, .50-.52, .54, .57-.67	Serine/threonine-protein kinase ATM
RRDW			4.9729e-10	3.57394e-06	9.30339	0.19442			A	4	0.91
RSDW			6.2543e-12	6.58729e-08	11.2038	0.21588
Rtillers			3.575e-06	0.00640439	5.44672	0.1132
RLeaves	MTA19	12241961	4.5187e-05	0.0469453	4.34499	0.06829	L3H012241961	2	C	10	0.87	C	3	HORVU3Hr1G004890	E3 ubiquitin-protein ligase SINA-like 7
RRDW			2.3776e-05	0.0277181	4.62386	0.07489			G	261	0.78
RRL			1.321e-05	0.017814	4.8791	0.08013
RSDW			6.5905e-06	0.0101924	5.18108	0.08324
RSL			1.6587e-05	0.0213319	4.78023	0.07893
RLeaves	MTA20	37270607	3.0328e-05	0.0332617	4.51816	0.07249	L3H037270607	3	AG	7	0.94	AG	3	HORVU3Hr1G015730, HORVU3Hr1G015740	MATE efflux family protein, Transcription factor GTE9
RSDW			1.3567e-06	0.00277184	5.86752	0.097			CA	5	0.93
Rtillers			4.1609e-07	0.000996788	6.38081	0.10875			CG	240	0.78
RLeaves		47263019	4.801e-08	0.000153552	7.31867	0.12622	L3H047263019							HORVU3Hr1G018170.1-.12	ATP-dependent RNA helicase DBP2
RRDW			1.1291e-06	0.00237026	5.94727	0.09927
RSDW			1.8493e-08	7.06063e-05	7.73299	0.13268
Rtillers			2.8918e-08	0.000101525	7.53883	0.13196
RLeaves	MTA21	139069608	1.8924e-10	1.50134e-06	9.72299	0.19358	L3H139069608	3	CAC	243	0.8	CAC	3	HORVU3Hr1G029750	unknown protein
RRDW			4.6794e-19	2.38213e-14	18.3298	0.38011			TAC	1	0.6
RSDW			9.6018e-23	8.37935e-18	22.0176	0.46922			CGT	9	0.71
Rtillers			4.2494e-10	3.09033e-06	9.37167	0.17406
RRDW		147607703	7.3306e-06	0.0110844	5.13486	0.08386	L3H147607703							HORVU3Hr1G030580.8-.25	Replication protein A 32 kDa subunit B
RSDW			2.9065e-06	0.00539673	5.53663	0.09005
RRDW		147607706	7.3306e-06	0.0110571	5.13486	0.08386	L3H147607706
RSDW			2.9065e-06	0.00538037	5.53663	0.09005
RLeaves	MTA22	350883746	1.3004e-17	4.41327e-13	16.8859	0.33883	L3H350883746	2	TT	269	0.79	AC	3	HORVU3Hr1G049720, HORVU3Hr1G049730	Mitochondrial substrate carrier family protein, Chromosome 3B, genomic scaffold, cultivar Chinese Spring
RRDW			1.2432e-31	1.89862e-26	30.9055	0.73493			AC	2	0.98
RRL			1.4551e-06	0.0029144	5.83711	0.09888
RSDW			1.3338e-37	8.14792e-32	36.8749	0.92453
RSL			4.6333e-08	0.000150553	7.33411	0.12805
Rtillers			3.0606e-18	1.33547e-13	17.5142	0.36105
RLeaves		350883753	1.3004e-17	4.18099e-13	16.8859	0.33883	L3H350883753
RRDW			1.2432e-31	1.51889e-26	30.9055	0.73493
RRL			1.4551e-06	0.00290487	5.83711	0.09888
RSDW			1.3338e-37	4.07396e-32	36.8749	0.92453
RSL			4.6333e-08	0.000149756	7.33411	0.12805
Rtillers			3.0606e-18	1.24644e-13	17.5142	0.36105
RLeaves	MTA23	455963287	1.9539e-05	0.024459	4.7091	0.08209	C3H455963287	2	A	229	0.78	G	3	HORVU3Hr1G059880	Transcription factor RADIALIS
RRDW			3.317e-10	2.47108e-06	9.47925	0.19652			G	6	0.87
RSDW			1.3026e-11	1.30448e-07	10.8852	0.20502
Rtillers			3.643e-05	0.0388383	4.43854	0.08553
RLeaves	MTA24	623069033	1.0801e-05	0.015203	4.96654	0.08032	L3H623069033	2	AA	265	0.79	AA	3	HORVU3Hr1G087930, HORVU3Hr1G087930	Glutaredoxin family protein, Glutaredoxin family protein
RRDW			1.0792e-08	4.64269e-05	7.9669	0.13975			GT	5	0.74
RSDW			2.8046e-10	2.14159e-06	9.55213	0.16977
Rtillers			3.5547e-05	0.0380964	4.4492	0.07065
RLeaves		623069037	1.0801e-05	0.0151681	4.96654	0.08032	L3H623069037
RRDW			1.0792e-08	4.61022e-05	7.9669	0.13975
RSDW			2.8046e-10	2.11515e-06	9.55213	0.16977
Rtillers			3.5547e-05	0.0380297	4.4492	0.07065
RRDW	MTA25	649054975	5.6816e-07	0.00131469	6.24553	0.10481	D3H649054975	6	ACTCGGA	265	0.78	CTCGCGA	3	HORVU3Hr1G095090.1-.6	MADS-box transcription factor family protein
RSDW			2.3302e-08	8.42291e-05	7.63261	0.13044			ACTCGGG	1	0.81
RLeaves		650300702	5.476e-06	0.00875701	5.26154	0.08468	D3H650300702		ACCGCTA	1	0.84			HORVU3Hr1G095580.1-.3	SAUR-like auxin-responsive protein family
RRDW			2.181e-05	0.0261754	4.66134	0.07443			CTCGCTG	4	0.77
RSDW			2.0433e-06	0.00392519	5.68967	0.09263			CTCGCGA	1	1.05
RLeaves		649838582	9.9018e-06	0.0142661	5.00429	0.07985	D3H649838582		ATCGCGA	3	0.81			HORVU3Hr1G095400.1-.7	TCP family transcription factor
RRDW			2.7916e-05	0.031348	4.55415	0.07242
RSDW			4.8674e-06	0.00830558	5.3127	0.0855
RLeaves		650064282	9.9018e-06	0.0142325	5.00429	0.07985	D3H650064282							HORVU3Hr1G095430.1	Chromosome 3B, genomic scaffold, cultivar Chinese Spring
RRDW			2.7916e-05	0.0312905	4.55415	0.07242
RSDW			4.8674e-06	0.00828244	5.3127	0.0855
RLeaves		650326907	9.9018e-06	0.0141991	5.00429	0.07985	D3H650326907							HORVU3Hr1G095580.1-.3	SAUR-like auxin-responsive protein family
RRDW			2.7916e-05	0.0312332	4.55415	0.07242
RSDW			4.8674e-06	0.00825944	5.3127	0.0855
RRDW		650981422	5.3768e-09	2.60681e-05	8.26948	0.14537	D3H650981422							HORVU3Hr1G095880.1-.4	NAC domain protein
RSDW			2.095e-10	1.64076e-06	9.67882	0.17214
RRDW		651812377	2.3006e-07	0.000605772	6.63816	0.11256	D3H651812377							HORVU3Hr1G096050.1-.4	Transaldolase 1
RSDW			1.1508e-08	4.78232e-05	7.939	0.1366
RRDW	MTA26	654302848	2.9621e-06	0.00545026	5.5284	0.0909	D3H654302848	9	AATG	4	0.8	AATC	3	HORVU3Hr1G096720.1-.2	Unknown function
RSDW			5.1128e-07	0.00119667	6.29134	0.10416			AGAG	1	0.9
RLeaves		655836284	2.7922e-06	0.0052808	5.55405	0.09021	D3H655836284		GGTG	1	0.84			HORVU3Hr1G097400.1,.3-.4, .5-.7	Protein LURP-one-related 11
RRDW			6.2357e-09	2.95292e-05	8.20511	0.14401			GGAG	1	0.58
RSDW			2.4111e-10	1.86442e-06	9.61778	0.1708			GGAC	261	0.78
RLeaves		655523203	1.3368e-05	0.0179084	4.87393	0.07764	D3H655523203		AGAC	2	0.73			HORVU3Hr1G097270.1	Protein LURP-one-related 11
RRDW			4.0644e-08	0.000137175	7.391	0.12761			AATC	2	1.39
RSDW			4.8627e-09	2.39559e-05	8.31312	0.14415			GATC	1	0.7
RRDW		656927659	4.9319e-07	0.00115877	6.30699	0.10601	D3H656927659		GAAG	1	0.59			HORVU3Hr1G097810.1	Flowering promoting factor 1
RSDW			1.3211e-07	0.000380676	6.87906	0.11557
RRDW	MTA27	659494414	1.0397e-06	0.00223638	5.98309	0.09969	D3H659494414	5	GTAG	3	1.21	GTAG	3	HORVU3Hr1G098610.1-.2	Leucine-rich repeat receptor-like protein kinase family protein
RSDW			2.1705e-07	0.000579002	6.66344	0.11137			GTCA	5	0.79
RRDW		659577427	1.1279e-06	0.00238412	5.94773	0.09931	D3H659577427		GTCG	2	0.84			HORVU3Hr1G098660.1-.8	Spermatogenesis-associated protein 20 isoform 2
RSDW			4.0381e-07	0.000986718	6.39382	0.10627			TGCG	3	0.69
RRDW		660279535	1.291e-06	0.00265537	5.88907	0.0983	D3H660279535		TGAG	261	0.79			HORVU3Hr1G098920.1-.6	Succinate dehydrogenase subunit 4
RSDW			1.7343e-07	0.000468783	6.76088	0.11353
RRDW		660063591	5.9366e-08	0.000186936	7.22646	0.12421	D3H660063591							HORVU3Hr1G098810.1-.4, HORVU3Hr1G098820.1	FAR1 family, putative, Glutathione S-transferase family protein
RSDW			4.5065e-09	2.27515e-05	8.34616	0.14475
RLeaves	MTA28	674469286	2.8225e-06	0.00532163	5.54937	0.09167	L3H674469286	7	GCG-CGT	242	0.79	GGCTCGT	3	HORVU3Hr1G108150, HORVU3Hr1G108170	Cytochrome P450 superfamily protein, Chromosome 3B, genomic scaffold, cultivar Chinese Spring
RRDW			1.3608e-06	0.00277095	5.86621	0.09772			ACG-CGT	8	0.74
RSDW			4.4523e-08	0.000146227	7.35142	0.1254			GGG-CGT	3	0.76
RRDW		679432719	1.5023e-06	0.00294143	5.82324	0.09659	D3H679432719		GGCTGGT	4	0.68			HORVU3Hr1G109840.1-.2	Coffea canephora DH200=94 genomic scaffold, scaffold_3
RSDW			1.3685e-06	0.00276818	5.86376	0.09595			GGCTCGT	1	0.81
RLeaves		679483474	2.3366e-05	0.0274497	4.63142	0.07296	L3H679483474		GCGTCGT	1	0.62
RRDW			4.3416e-08	0.000144929	7.36235	0.12702			GGCTGCG	3	0.77
RSDW			1.1172e-08	4.70673e-05	7.95187	0.13686
RRDW		679483719	1.5641e-07	0.000434308	6.80574	0.11591	L3H679483719
RSDW			4.4648e-08	0.000145853	7.3502	0.12488
RRDW		679484700	5.7259e-07	0.00131994	6.24216	0.10529	L3H679484700
RSDW			2.4974e-07	0.000646446	6.60251	0.1105
RRDW		680047567	1.5583e-09	9.33269e-06	8.80735	0.15645	D3H680047567							HORVU3Hr1G110110.1-.3	UDP-Glycosyltransferase superfamily protein
RSDW			5.2184e-10	3.50309e-06	9.28246	0.16392
RRDW		680049254	1.5498e-09	9.37368e-06	8.80972	0.15645	D3H680049254
RSDW			5.1861e-10	3.55965e-06	9.28516	0.16392
RRDW	MTA29	689148566	3.5644e-07	0.00088513	6.44801	0.10923	L3H689148566	3	AC	5	0.89	AC	3	HORVU3Hr1G113790	Disease resistance protein RPM1
RSDW			1.7714e-09	1.04049e-05	8.75168	0.15361			-T	8	0.78
Rtillers			1.0669e-08	4.68883e-05	7.97188	0.14172			-C	250	0.79
RLeaves		695382868	9.9448e-07	0.00216195	6.0024	0.09991	L3H695382868							HORVU3Hr1G116150	BnaA01g30480D protein
RRDW			1.1289e-06	0.00237801	5.94734	0.09925
RSDW			2.3824e-07	0.000621949	6.62299	0.1108
Rtillers			1.3253e-05	0.0178326	4.87769	0.07888
RRDW	MTA30	43542131	2.1426e-08	7.88477e-05	7.66906	0.13375	L4H043542131	3	GTT	250	0.79	GTT	4	HORVU4Hr1G012820.1	Disease resistance protein RPM1
RSDW			1.3969e-09	8.70753e-06	8.85483	0.1556			GCC	4	0.75
RRDW		43655413	4.2081e-12	4.59044e-08	11.3759	0.21187	L4H043655413		ATT	6	0.73			HORVU4Hr1G012940.1	Unknown function
RSDW			2.4934e-13	3.54225e-09	12.6032	0.2357
RRDW		43655390	4.263e-12	4.56874e-08	11.3703	0.21186	L4H043655390
RSDW			2.5226e-13	3.50229e-09	12.5982	0.23571
RLeaves	MTA31	258403614	4.2408e-05	0.044589	4.37255	0.06944	L4H258403614	2	C	260	0.78	T	4	HORVU4Hr1G035220	unknown function
RSDW			2.861e-06	0.00536113	5.54348	0.09003			T	8	0.83
Rtillers			1.6775e-08	6.56892e-05	7.77534	0.13654
Rtillers	MTA32	591936079	4.9501e-06	0.008021	5.30539	0.08644	L4H591936079	3	CGG	256	0.78	GTG	4	HORVU4Hr1G073880.1-.13	Ankyrin repeat family protein
RSDW			4.2627e-07	0.00101323	6.37032	0.10612			CGA	6	0.8
RLeaves			1.44e-07	0.000411059	6.84164	0.11925			GTG	6	0.99
RSDW		591936084	4.9501e-06	0.00799978	5.30539	0.08644	L4H591936084
Rtillers			4.2627e-07	0.0010093	6.37032	0.10612
RLeaves			1.44e-07	0.000409148	6.84164	0.11925
RSDW		590243473	4.1819e-06	0.00729897	5.37863	0.08808	L4H590243473							HORVU4Hr1G073520.1	Auxin-induced protein 5NG4
RRDW			2.2083e-07	0.000586524	6.65594	0.11128
RLeaves	MTA33	409814	2.8992e-09	1.56731e-05	8.53772	0.16283	L5H000409814	3	GG	242	0.78	AG	5	HORVU5Hr1G000060.1-.13, HORVU5Hr1G000120.1	Casein kinase 1, Sucrose transporter 4
RRDW			3.8434e-10	2.82874e-06	9.41528	0.18658			AG	2	1.04
RSDW			1.304e-14	2.27596e-10	13.8847	0.26962			G-	9	0.74
RSL			1.1876e-06	0.00247604	5.92533	0.11011
Rtillers			1.0681e-09	6.86822e-06	8.97139	0.18027
RRDW		800373	4.4703e-06	0.00771417	5.34966	0.08761	L5H000800373							HORVU5Hr1G000220.1	Alpha/beta-Hydrolases superfamily protein
RSDW			1.6486e-07	0.000451613	6.78288	0.11386
RRDW	MTA34	9590416	7.8645e-07	0.00172815	6.10433	0.10446	L5H009590416	8	GTCAAG	2	0.73	TTTAAG	5	HORVU5Hr1G005910.1, HORVU5Hr1G005890	Late embryogenesis abundant protein D-34, Chromosome 3B, genomic scaffold, cultivar Chinese Spring
RSDW			4.1733e-13	5.31122e-09	12.3795	0.23774			TTTAAG	226	0.8
Rtillers			4.1298e-16	9.34375e-12	15.3841	0.30165			TTTAGG	2	0.61
RLeaves			7.634e-07	0.00168356	6.11725	0.10462			TTTTAG	3	0.77
RRDW		9590448	1.875e-05	0.0236165	4.727	0.07642	L5H009590448		TCTAAA	2	0.68
RSDW			2.8887e-09	1.57558e-05	8.5393	0.15262			TCTAAG	1	0.72
RLeaves			6.5856e-11	6.00449e-07	10.1814	0.18388			TTCTGG	1	0.6
RLeaves		9590411	2.3711e-05	0.0276952	4.62505	0.07541	L5H009590411		TTTAAA	4	0.72
RRDW			1.747e-10	1.40422e-06	9.75771	0.17935
RSDW			4.5303e-13	5.53494e-09	12.3439	0.23143
Rtillers			2.037e-05	0.0251895	4.69101	0.0766
RRDW		9590386	1.3114e-11	1.29211e-07	10.8823	0.20406	L5H009590386
RSDW			2.722e-13	3.61482e-09	12.5651	0.23628
Rtillers			6.7334e-06	0.010309	5.17177	0.08607
RRDW		9591047	4.8535e-09	2.41049e-05	8.31394	0.14798	L5H009591047
RSDW			8.06e-11	7.24072e-07	10.0937	0.18267
RRDW		9590434	2.8907e-06	0.00540022	5.539	0.09204	L5H009590434
RSDW			2.2359e-08	8.17884e-05	7.65055	0.13149
RRDW	MTA35	411705586	1.6146e-06	0.0031512	5.79194	0.09629	L5H411705586	2	CT	7	0.69	GC	5	HORVU5Hr1G052600.1-.11, HORVU5Hr1G052590.1	Undescribed protein, B protein
RSDW			1.1139e-07	0.00033032	6.95315	0.11758			GC	264	0.79
RRDW		411705593	1.6705e-06	0.00324992	5.77715	0.09598	L5H411705593
RSDW			1.2155e-07	0.000356983	6.91525	0.11684
RLeaves	MTA36	498198388	2.0705e-05	0.0255005	4.68392	0.07748	L5H498198388	2	G	251	0.8	G	5	HORVU5Hr1G064620	BTB/POZ domain-containing protein
RRDW			7.4943e-10	4.92271e-06	9.12527	0.165			T	6	0.63
RSDW			6.1293e-11	5.67313e-07	10.2126	0.18474
Rtillers			4.2312e-06	0.00736398	5.37354	0.09015
RLeaves	MTA37	577696873	8.9499e-06	0.0129865	5.04818	0.0822	L5H577696873	2	C	261	0.79	n/a	5	HORVU5Hr1G087040, HORVU5Hr1G087030	Serine/threonine-protein kinase, receptor kinase 3
RRDW			9.0144e-11	7.64822e-07	10.0451	0.18376			T	3	0.8
RSDW			9.0801e-14	1.42227e-09	13.0419	0.24687
Rtillers			1.0068e-06	0.00217326	5.99706	0.10207
RRDW	MTA38	656383995	2.329e-08	8.46869e-05	7.63283	0.14729	L5H656383995	3	CAG	7	0.78	GGG	5	HORVU5Hr1G119650.1-.2	Ethylene receptor
RSDW			3.0593e-09	1.6251e-05	8.51438	0.15047			CGG	231	0.78
RRDW		655565619	1.3639e-06	0.00276804	5.86522	0.09863	L5H655565619		GGG	7	0.89			HORVU5Hr1G119370.1-.3	Jacalin-related lectin 31
RSDW			8.5837e-07	0.00187943	6.06633	0.10066			CGT	1	0.78
RLeaves		661572163	5.5067e-10	3.65645e-06	9.25911	0.1666	L5H661572163							HORVU5Hr1G122220.1-9, HORVU5Hr1G122180	Terpene cyclase/mutase family member, Disease resistance protein (CC-NBS-LRR class) family
RRDW			6.0307e-17	1.67456e-12	16.2196	0.32721
RSDW			8.5013e-22	5.19327e-17	21.0705	0.44397
Rtillers			5.194e-10	3.52546e-06	9.2845	0.16974
RLeaves	MTA39	2599105	3.488e-07	0.000876852	6.45742	0.11928	L6H002599105	2	T	250	0.79	C	6	HORVU6Hr1G000830.1-14, HORVU6Hr1G000810	thionin 2.2, thionin 2.2
RRDW			3.1809e-13	4.13436e-09	12.4974	0.24334			C	2	0.9
RSDW			2.565e-15	4.60855e-11	14.5909	0.28438
Rtillers			4.0715e-07	0.000990916	6.39025	0.11269
RRDW	MTA40	8899912	9.5779e-08	0.000288224	7.01873	0.121	L6H008899912	4	GGG	226	0.79	GGA	6	HORVU6Hr1G003990.3,.5,	Undescribed protein
RSDW			5.8023e-09	2.76915e-05	8.2364	0.14319			GAG	9	0.71
RRDW		8952528	1.0398e-06	0.00222875	5.98305	0.10062	L6H008952528		CGG	6	0.72			HORVU6Hr1G004010.9-.13	Acid beta-fructofuranosidase
RSDW			6.8753e-07	0.00154981	6.16271	0.10212			GGA	6	0.87
RLeaves		12567841	7.2587e-08	0.000222824	7.13914	0.12237	L6H012567841							HORVU6Hr1G005690.1-6, HORVU6Hr1G005650	Disease resistance protein, Mitochondrial transcription termination factor family protein
RRDW			1.6488e-05	0.0212493	4.78283	0.07703
RSDW			1.3132e-08	5.34805e-05	7.88167	0.13576
Rtillers			1.4237e-06	0.00287033	5.84658	0.09695
RRDW	MTA41	257156936	2.4638e-08	8.80167e-05	7.60839	0.13537	C6H257156936	2	C	4	0.76	T	6	HORVU6Hr1G044670	ATP synthase subunit 4
RSDW			2.9177e-09	1.56348e-05	8.53496	0.15085			T	235	0.79
Rtillers			2.2532e-05	0.0267789	4.6472	0.07819
RLeaves	MTA42	312413768	3.3447e-17	9.72957e-13	16.4756	0.34328	L6H312413768	3	CA	2	0.73	CG	6	HORVU6Hr1G051370.1-.2	Unknown function
RRDW			4.542e-31	4.62436e-26	30.3428	0.73691			CG	231	0.79
RRL			1.5023e-06	0.00295088	5.82324	0.10404
RSDW			1.0191e-36	2.07516e-31	35.9918	0.92326
RSL			7.8819e-08	0.000240745	7.10337	0.13246
Rtillers			5.5119e-18	2.10444e-13	17.2587	0.36442
RLeaves		312323946	1.0583e-05	0.0149306	4.97539	0.08512	L6H312323946							HORVU6Hr1G051300.1	Glutathione reductase
RRDW			2.3387e-09	1.3107e-05	8.63103	0.15768
RSDW			2.1652e-12	2.4494e-08	11.6645	0.21831
Rtillers			5.0699e-06	0.00817177	5.295	0.09226
RLeaves	MTA43	502984487	4.437e-08	0.000146512	7.35291	0.12924	L6H502984487	2	A	260	0.79	A	6	HORVU6Hr1G072350	Sodium-coupled neutral amino acid transporter 1
RRDW			2.4255e-14	4.1158e-10	13.6152	0.26446			T	2	0.7
RSDW			2.4761e-16	6.0504e-12	15.6062	0.30682
Rtillers			6.6915e-08	0.000209626	7.17448	0.12436
RRDW	MTA44	581687061	4.1558e-06	0.0072951	5.38135	0.08822	L6H581687061	3	AC	245	0.79	AT	6	HORVU6Hr1G094720.1, HORVU6Hr1G094650.1-.7	Unknown function, Zinc finger CCCH domain-containing protein 19
RSDW			1.3678e-07	0.000392282	6.86398	0.11541			GC	9	0.67
RLeaves		582498713	1.1231e-05	0.0155574	4.94958	0.07961	L6H582498713		AT	11	0.96			HORVU6Hr1G094950.1-.2	Homoserine kinase
Rtillers			1.089e-05	0.0151883	4.96297	0.0805
RRDW	MTA45	4018128	3.8051e-06	0.00677685	5.41963	0.0934	L7H004018128	6	CGA	229	0.79	AGT	7	HORVU7Hr1G002010.1-.5	Leucine-rich repeat receptor-like protein kinase family protein
RSDW			6.543e-07	0.00148587	6.18422	0.10529			CAA	4	0.73
RLeaves			2.9716e-08	0.000103731	7.52701	0.12955			AAA	1	0.63
RRDW		4018173	6.8923e-06	0.0105259	5.16164	0.08438	L7H004018173		CGT	3	0.73
RSDW			9.9976e-07	0.00216572	6.0001	0.09891			AAT	2	0.73
RRDW		4018104	1.8339e-05	0.0231945	4.73662	0.07712	L7H004018104		AGT	3	1.05
RSDW			4.3053e-06	0.00747165	5.366	0.08752
RLeaves	MTA46	24098391	2.7876e-05	0.0313608	4.55477	0.07544	L7H024098391	2	C	256	0.79	T	7	HORVU7Hr1G018340.1-17	2-oxoglutarate (2OG) and Fe(II)-dependent oxygenase superfamily protein
RRDW			1.8202e-09	1.05898e-05	8.73988	0.15745			T	3	0.87
RSDW			7.2578e-12	7.38941e-08	11.1392	0.20504
RRDW	MTA47	82315424	4.3058e-09	2.19194e-05	8.36595	0.15151	L7H082315424	3	CC	246	0.78	CT	7	HORVU7Hr1G036070.2,	12-oxophytodienoate reductase 2
RSDW			9.4916e-13	1.09401e-08	12.0227	0.2296			TC	2	0.87
Rtillers			6.3976e-16	1.2607e-11	15.194	0.29826			CT	6	0.93
RLeaves			2.6941e-08	9.56844e-05	7.56959	0.13383
RRDW		82157498	1.0061e-05	0.0143265	4.99736	0.08113	L7H082157498							HORVU7Hr1G036060	12-oxophytodienoate reductase 2
RSDW			3.8476e-07	0.000947751	6.41481	0.10674
Rtillers			1.6834e-06	0.00326462	5.77381	0.09604
RRDW	MTA48	539446645	7.2277e-06	0.0109832	5.141	0.08486	L7H539446645	2	A	8	0.92	C	7	HORVU7Hr1G088790	Ethylene-responsive transcription factor 11
RSDW			2.4536e-07	0.000637811	6.6102	0.11156			C	235	0.78
Rtillers			2.1235e-05	0.0258407	4.67295	0.07711
RLeaves	MTA49	585644789	2.4522e-09	1.36182e-05	8.61044	0.16721	L7H585644789	2	AT	239	0.79	AT	7	HORVU7Hr1G095980.1	UDP-Glycosyltransferase superfamily protein
RRDW			5.0114e-10	3.51881e-06	9.30004	0.17402			TC	3	0.69
RSDW			5.8354e-13	6.98967e-09	12.2339	0.2323
Rtillers			5.8513e-07	0.00134378	6.23275	0.11398
RLeaves		585644784	1.2037e-06	0.0024926	5.91948	0.11532	L7H585644784
RRDW			4.1918e-13	5.22589e-09	12.3776	0.24542
RSDW			6.7717e-16	1.29272e-11	15.1693	0.30268
Rtillers			2.2839e-07	0.000603978	6.64132	0.12492
RSL	MTA50	640049188	8.409e-09	3.8335e-05	8.07526	0.14462	L7H640049188	-	-	-	-	n/a	7	HORVU7Hr1G114730.1	F-box domain containing protein
RLeaves	MTA51	655992857	7.0558e-08	0.000217689	7.15145	0.12563	L7H655992857	3	ATCG	228	0.78	ACCG	7	HORVU7Hr1G122350.1-.3	2-oxoglutarate (2OG) and Fe(II)-dependent oxygenase superfamily protein
RRDW			5.7284e-19	2.69182e-14	18.242	0.38224			ACCG	5	0.82
RSDW			2.1633e-22	1.6519e-17	21.6649	0.45909			GCCG	1	0.66
Rtillers			2.0054e-08	7.46987e-05	7.6978	0.13814
RSDW		655992885	1.1548e-06	0.0024159	5.93749	0.10119	L7H655992885							HORVU7Hr1G122800.1	Thionin-like peptide
RRDW			2.6256e-07	0.000673919	6.58077	0.11048
Rtillers		652578556	6.0478e-06	0.00949738	5.2184	0.0852	L7H652578556							HORVU7Hr1G120820.4	Unknown protein
RSL		652581348	6.969e-09	3.24979e-05	8.15683	0.15317	L7H652581348

## Sheet: Supplementary Table S6
Supplementary Table S6: MTA regions identified for NUE related traits using the average phenotype data between the two years. All these MTAs overlap with MTAs reported in Supplementary Table S5
Trait	Marker	Chr	Position	p	-log10(p)	Overlapping MTA
RRDW	L1H018501742	1	18501742	0.00010026	3.99887	MTA1
RSL	L1H041545617	1	41545617	6.2199e-05	4.20622	MTA2
RRL	C1H321264918	1	321264918	9.5432e-05	4.02031	MTA5
RSL			321264918	0.0001652	3.78199
RSDW			321264918	0.00086694	3.06201
RRDW	L1H031628273	1	31628273	0.0006512	3.18629
RRL	D3H623130349	3	623130349	0.00061203	3.21323	MTA24
RRL	D3H623131530	3	623131530	0.00084376	3.07378
RRL	D3H670142583	3	670142583	0.00085328	3.06891	MTA28
RRDW	L3H695268828	3	695268828	2.5571e-05	4.59225	MTA29
RRDW	L3H689137350	3	689137350	0.00070337	3.15282
RRDW	L3H689137349	3	689137349	0.00090025	3.04564
RRL	C4H586027606	4	586027606	3.1266e-05	4.50493	MTA32
RSL	D5H008608468	5	8608468	0.00047585	3.32253	MTA34
RRL	D6H577036150	6	577036150	0.00075761	3.12055	MTA44
RRDW	L7H004405653	7	4405653	0.0004825	3.3165	MTA45
RRL	C7H534220128	7	534220128	0.00096368	3.01607	MTA48
RSL	D7H579863459	7	579863459	0.00070683	3.15069	MTA49
RRL	L7H638178213	7	638178213	3.4452e-05	4.46279	MTA50
RRL	D7H639950848	7	639950848	0.00041587	3.38104
RRL	D7H641059201	7	641059201	0.00047001	3.32789
RRL	D7H639701932	7	639701932	0.00072087	3.14214
RRL	D7H641445129	7	641445129	0.00080035	3.09672
RRL	D7H640189687	7	640189687	0.00085654	3.06725
